# Supplementary material for: A graphitic-C3N4-hybridized Ag3PO4 tetrahedron with reactive {111} facets to enhance the visible-light photocatalytic activity
Source: Royal Society of Chemistry journal article supplement (doi:10.1039/c5ra18096a), 2015-01-01
Supplement: c5ra18096a1.pdf [file c5ra18096a1.pdf]

## Supplementary materials

### **Graphitic-C<sub>3</sub>N<sub>4</sub>-hybridized Ag<sub>3</sub>PO<sub>4</sub> tetrahedron with reactive {111} facets to enhance the visible-light photocatalytic activity**

Chunni Tang,<sup>ab</sup> Enzhou Liu,<sup>a</sup> Jun Fan,<sup>\*a</sup> Xiaoyun Hu,<sup>c</sup> Yongning Ma<sup>a</sup> and Jun Wan<sup>a</sup>

<sup>a</sup> School of Chemical Engineering, Northwest University, Xi'an 710069, PR China

<sup>b</sup> School of Chemical Engineering, Shaanxi Institute of Technology, Xi'an 710300, PR China

<sup>c</sup> School of Physics, Northwest University, Xi'an 710069, PR China

\* Corresponding author: Fax: +86 29 88302223; *E-mail address*: fanjun@nwu.edu.cn.

#### Content

**Fig. S1 Schematic diagram of the photocatalytic degradation set-up: 1. NO source, 2. air generator, 3. gas washing bottle, 4. mixing chamber, 5. flow control, 6. reactor cell, 7. illuminant, 8. NO analyser, 9. gas washing bottle with NaOH solution.**

**Fig. S2 SEM of C<sub>3</sub>N<sub>4</sub>/Ag<sub>3</sub>PO<sub>4</sub>(IR) hybrid.**

**Fig. S3 EDS pattern of 10CA.**

**Fig. S4 The plot of transformed Kubelka-Munk function vs. the energy of light.**

**Fig. S5 Nitrogen adsorption-desorption isotherm of (a) Ag<sub>3</sub>PO<sub>4</sub> and (b) 10CA.**

**Fig. S6 Photocatalytic activity over samples under the visible-light irradiation (> 400 nm): (a) photocatalytic degradation of MB; photocatalytic removal of NO.**

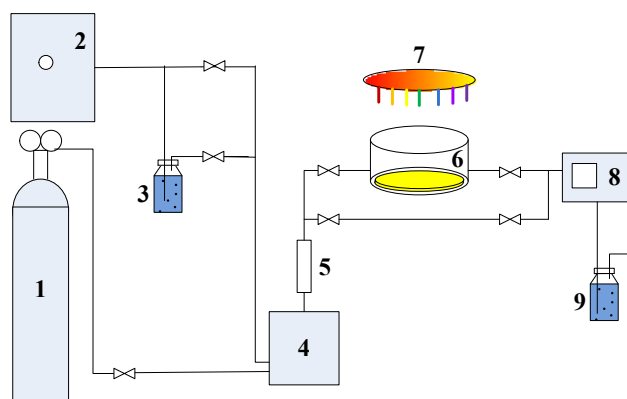

**Fig. S1 Schematic diagram of the photocatalytic degradation set-up: 1. NO source, 2. air generator, 3. gas washing bottle, 4. mixing chamber, 5. flow control, 6. reactor cell, 7. illuminant, 8. NO analyser, 9. gas washing bottle filled with NaOH solution.**

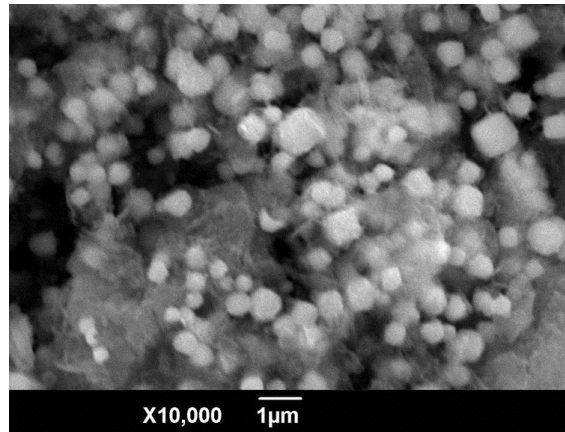

**Fig. S2 SEM of C<sub>3</sub>N<sub>4</sub>/Ag<sub>3</sub>PO<sub>4</sub>(IR) hybrid.**

**Preparation of C<sub>3</sub>N<sub>4</sub>/Ag<sub>3</sub>PO<sub>4</sub>(IR) hybrid:** the prepared Ag<sub>3</sub>PO<sub>4</sub> (IR) powders were added into g-C<sub>3</sub>N<sub>4</sub> dispersion. The mixture was sonicated for 30 min to completely disperse Ag<sub>3</sub>PO<sub>4</sub> crystals and then stirred until the ethanol was volatilized completely. The weight ratios of g-C<sub>3</sub>N<sub>4</sub> and Ag<sub>3</sub>PO<sub>4</sub> is 10%.

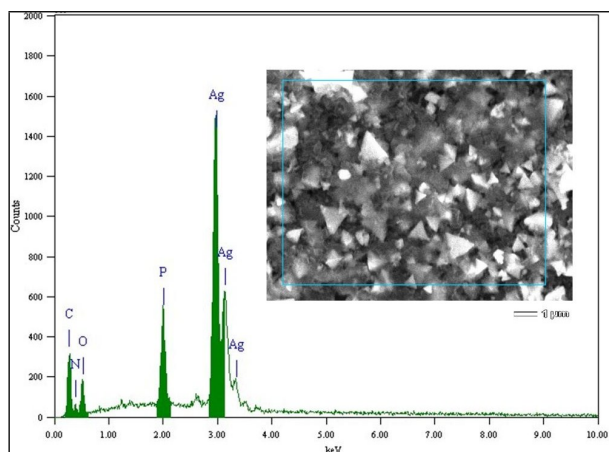

**Fig. S3 EDS pattern of 10CA.**

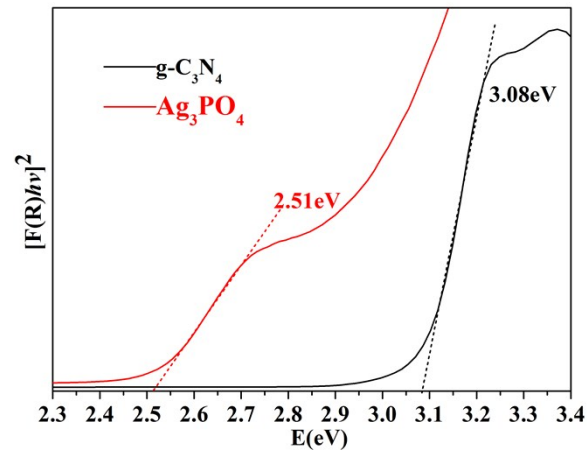

Fig. S4 The plot of transformed Kubelka-Munk function vs. the energy of light.

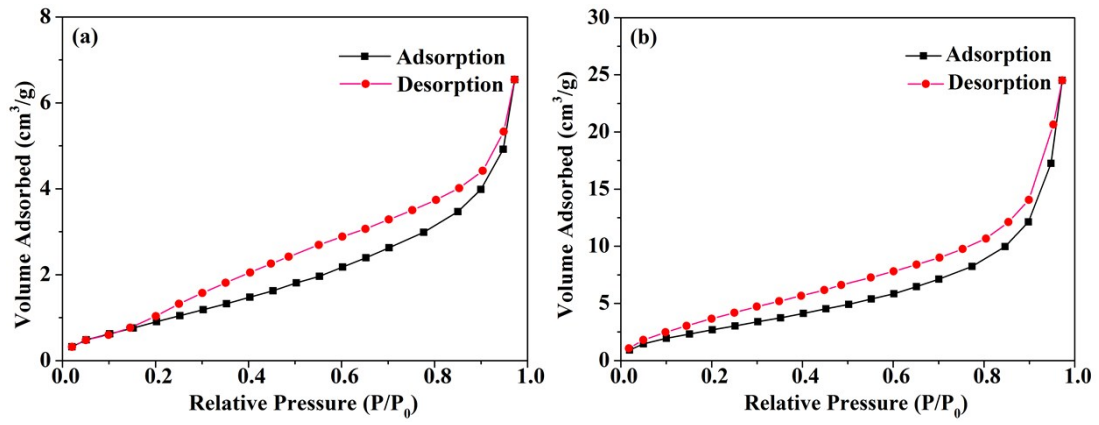

Fig. S5 Nitrogen adsorption-desorption isotherm of (a)  $\text{Ag}_3\text{PO}_4$  and (b) 10CA.

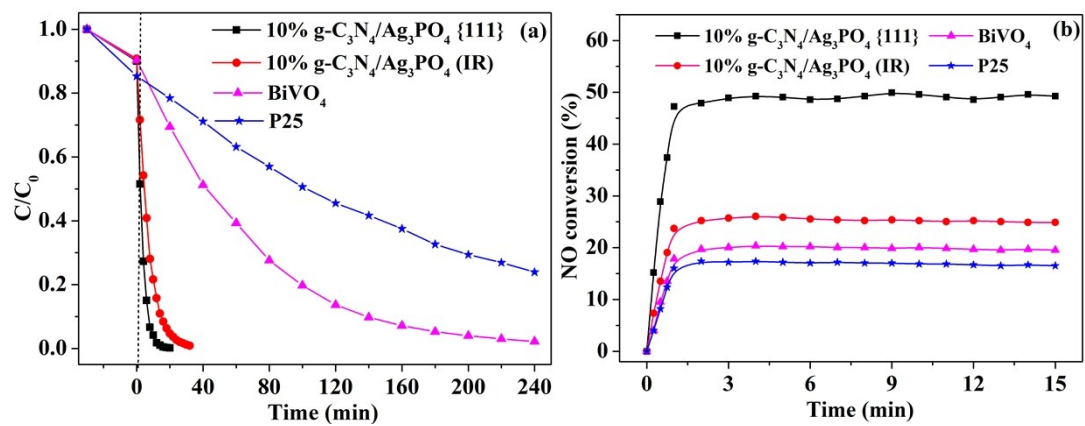

Fig. S6 Photocatalytic activity over samples under the visible-light irradiation (> 400 nm): (a) photocatalytic degradation of MB; photocatalytic removal of NO.
